# Supplementary material for: Natural Deep Eutectic Solvent-Based Matrix Solid Phase Dispersion (MSPD) Extraction for Determination of Bioactive Compounds from Sandy Everlasting (Helichrysum arenarium L.): A Case of Stability Study
Source: MDPI journal article supplement (doi:10.3390/plants11243468), 2022-12-11
Supplement: s1 [file s1]

## **SUPPLEMENTARY MATERIAL**

### **Natural deep eutectic solvent-based matrix solid phase dispersion (MSPD) extraction for determination of bioactive compounds from sandy everlasting (*Helichrysum Arenarium* L.): a case of stability study**

Milena Ivanović<sup>a</sup>, Peter Krajnc<sup>a</sup>, Aleš Mlinarič<sup>b</sup>, Maša Islamčević Razboršek<sup>a\*</sup>

*<sup>a</sup>University of Maribor, Faculty of Chemistry and Chemical Engineering, Smetanova ulica*

*17, SI-2000 Maribor, Slovenia*

*<sup>b</sup>MARIFARM, proizvodnja in storitve d.o.o, Minařikova ulica 8, SI-2000 Maribor, Slovenia*

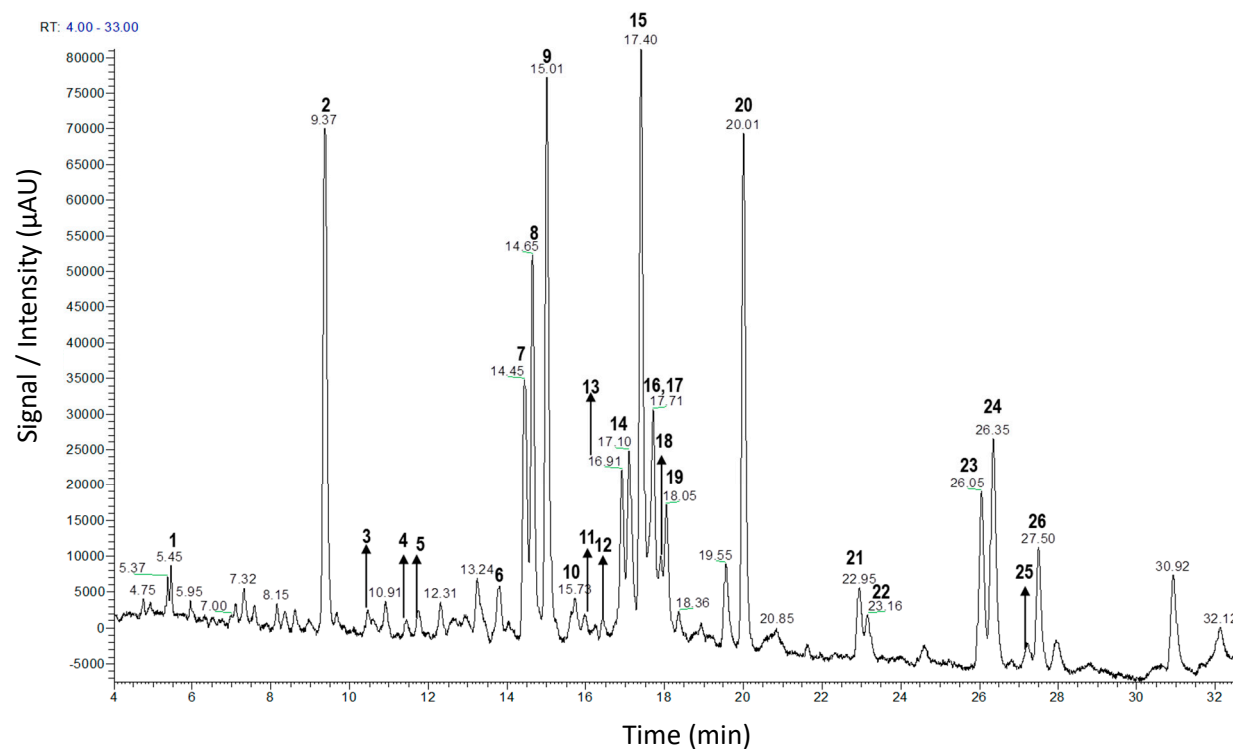

**Figure S1.** Typical HPLC-UV chromatogram of *H. arenarium* extract . The following compounds were identified: 2. chlorogenic acid; 5. 1,3-dicaffeoylquinic acid; 7.naringenin-4'-O-glucoside; 8. tomorosite A; 9. naringenin-5-O-glucoside; 13. 1,5-dicaffeoylquinic acid; 14. 3,5-dicaffeoylquinic acid; 15. kaempferol 3-O-glucoside; 17. apigenin-7-O-glucoside; 19. 4,5-O-dicaffeoylquinic acid; 20. Isosalipurposide; 23. naringenin; 24. apigenin. Identification based on the (Ivanović et al., 2020), Ivanović, M., Albreht, A., Krajnc, P., Vovk, I., & Islamčević Razboršek, M. (2020). Sustainable ultrasound-assisted extraction of valuable phenolics from inflorescences of *Helichrysum arenarium* L. using natural deep eutectic solvents. *Industrial Crops and Products*, May, 113102. <https://doi.org/10.1016/j.indcrop.2020.113102>

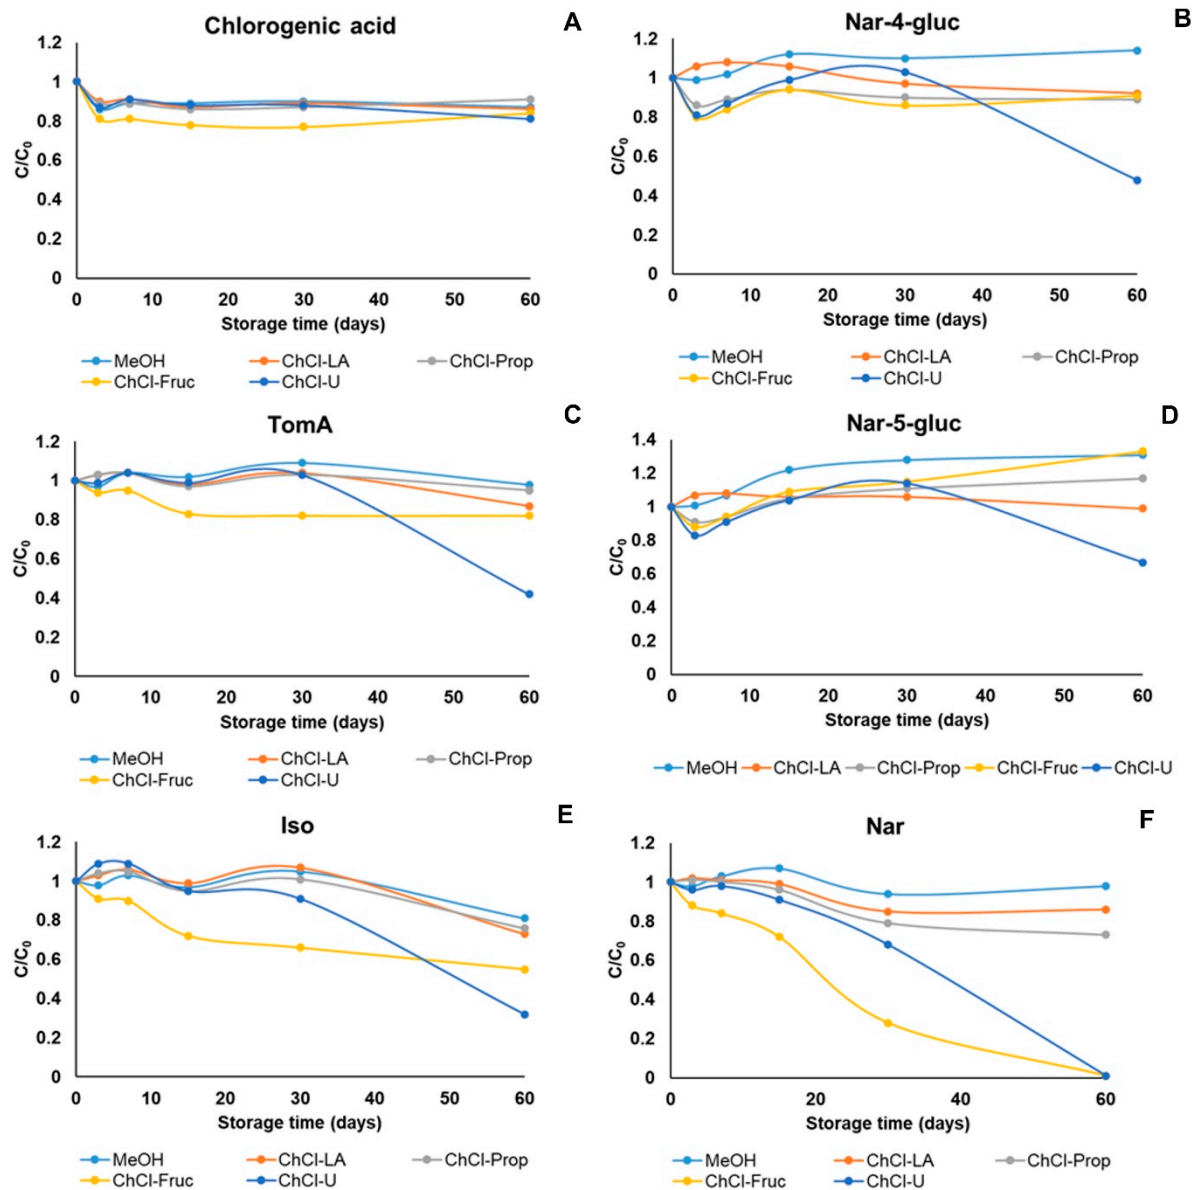

**Figure S2.** Influence of the extraction solvent on the stability of 5 selected phenolic compounds from *H.arenarium*, over a period of 0 to 60 days, stored at -18 °C: (A) chlorogenic acid; (B) naringenin-4'-O-glucoside; (C) tomoroside A; (D) naringenin-5-O-glucoside; (E) isosalipurposide; (F) naringenin.

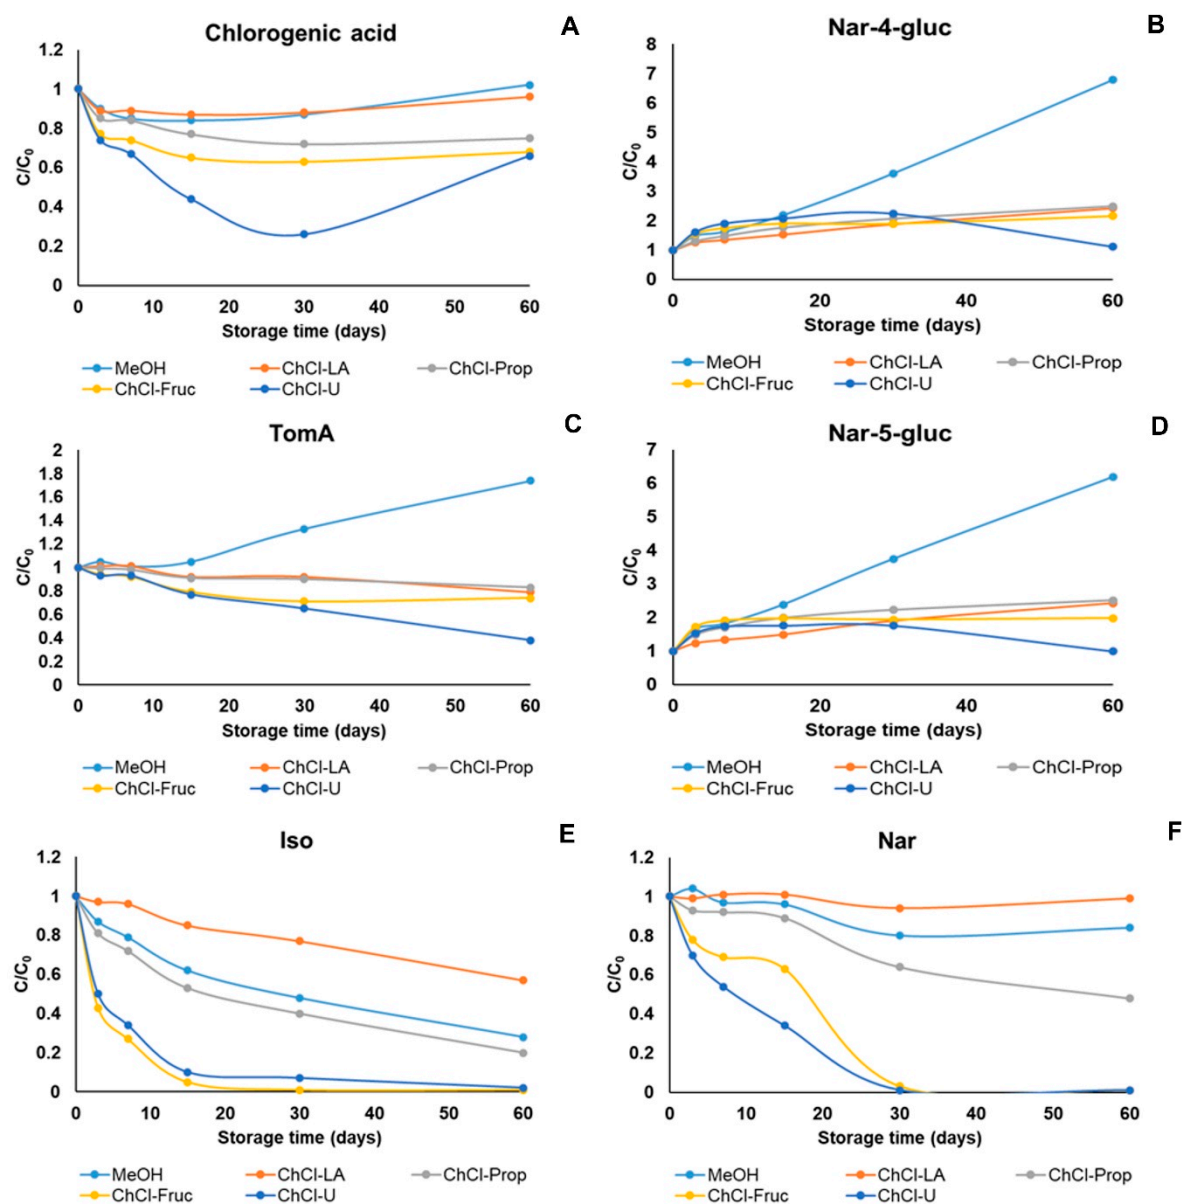

**Figure S3.** Influence of the extraction solvent on the stability of 5 selected phenolic compounds from *H.arenarium*, over a period of 0 to 60 days, stored at 4 °C: (A) chlorogenic acid; (B) naringenin-4'-O-glucoside; (C) tomoroside A; (D) naringenin-5-O-glucoside; (E) isosalipurposide; (F) naringenin.

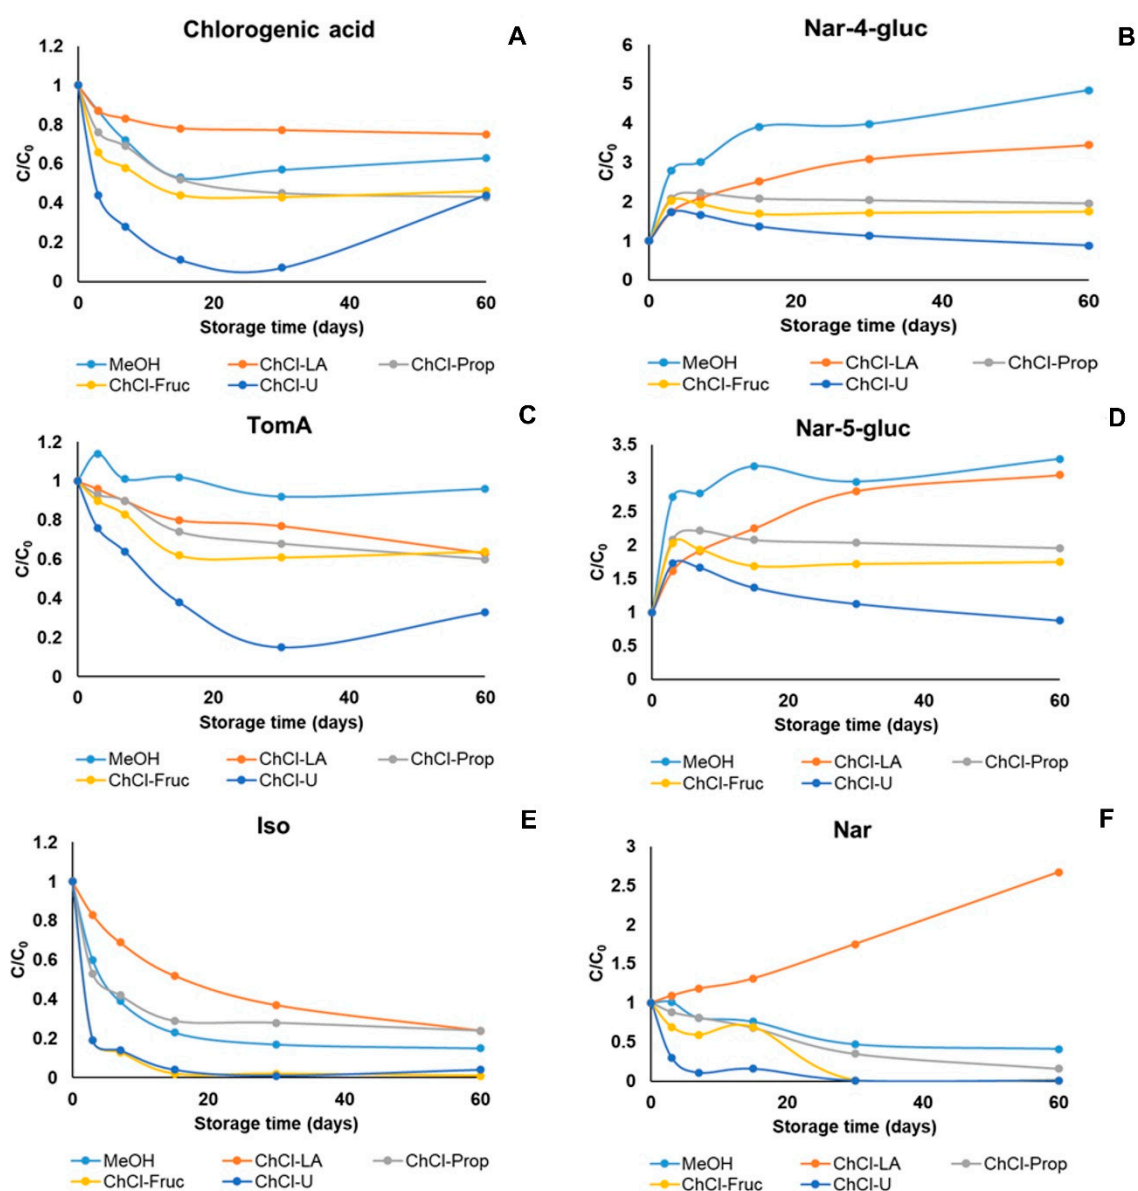

**Figure S4.** Influence of the extraction solvent on the stability of 5 selected phenolic compounds from *H.arenarium*, over a period of 0 to 60 days, stored at 25 °C: (A) chlorogenic acid; (B) naringenin-4'-O-glucoside; (C) tomoroside A; (D) naringenin-5-O-glucoside; (E) isosalipurposide; (F) naringenin.
